# Supplementary material for: Photodynamic Therapy: A Compendium of Latest Reviews
Source: MDPI journal article supplement (doi:10.3390/cancers13174447), 2021-09-03
Supplement: s1 [file s1]

Table S1. Main characteristics of some common photosensitizers.

| PS/<br>Drug (substance)                                     | Lambda<br>(nm) | Time to PDT<br>after dose<br>delivery | Clearance                                                        | Clinical/preclinical application<br>[1]                                                                                                                          | Clinical<br>approved?          | Side effects [1]                                                       | Localization                                                                    | Primary mechanism of action                                                                          | Manufacturer<br>[2]                   | Refs.                |
|-------------------------------------------------------------|----------------|---------------------------------------|------------------------------------------------------------------|------------------------------------------------------------------------------------------------------------------------------------------------------------------|--------------------------------|------------------------------------------------------------------------|---------------------------------------------------------------------------------|------------------------------------------------------------------------------------------------------|---------------------------------------|----------------------|
| Photofrin®<br>1 <sup>st</sup> generation                    | 630            | 24-48 h                               | 4-12 weeks<br>[3]                                                | <b>Approved</b><br>Esophageal cancer, lung<br>cancer, microinvasive<br>endobronchial cancer, gastric<br>and papillary bladder, cervical<br>dysplasia and cancer. | Yes<br>Worldwide               | Mild to moderate<br>erythema<br>Photosensitivity,<br>mild constipation | Mitochondrial membrane<br>and lysosome [4]<br>Golgi apparatus [1]               | Ischemic cell necrosis[1]<br>Rapid illumination post infusion<br>will favor vascular shutdown<br>[5] | Axcan harma,<br>Canada                | [3]<br>[6]           |
| TOOKAD®<br>(pheophorbides)                                  | 753            | 15 min                                | 24-48h [7]                                                       | <b>Clinical trial:</b> Prostate Cancer.                                                                                                                          | EMA Yes<br>FDA No              | -                                                                      | Vascular occlusion [8]                                                          | Vascular damage [1]                                                                                  | Negma-<br>Lerads                      | [7]                  |
| Foscan®<br>(Temoporfin)                                     | 652            | 48-96 h                               | Dark 1 day<br>1-7 home [9]                                       | <b>Preclinical testing:</b><br>Pancreas, Breast<br><b>Approved:</b><br>Head and neck<br>Cancer.                                                                  | EMA,<br>Norway,<br>Iceland     | Swelling,<br>bleeding,<br>ulceration,<br>scarring<br>Photosensitivity  | Mitochondria [10]<br>Endoplasmic reticulum<br>(ER) [1]                          | Vascular damage and direct<br>tumor cytotoxicity [1]                                                 | Biolitec,<br>Germany                  | [11]<br>[12]<br>[13] |
| Purlytin® (purpirins)                                       | 664            | 24 h                                  | 7-14 days<br>[14]                                                | <b>Clinical trials:</b><br>Metastatic breast<br>cancer, AIDS related<br>Kaposi<br>sarcoma, basal cell<br>carcinomas                                              | No                             | Photosensitivity                                                       | Accumulates in cellular<br>membranes [5]<br>Mitochondria, lysosomes<br>[1]      | Direct tumor cytotoxicity [1]                                                                        |                                       | [14]                 |
| Lutrin® and Lutex®<br>(metalloporphyrins)<br>[1]            | 732            | 3h                                    |                                                                  | <b>Clinical Trials:</b><br>Recurrent prostate<br>cancer, cervical<br>cancer<br><b>Preclinical testing:</b><br>Recurrent breast<br>cancer                         | No                             | Photosensitivity<br>(minimal)                                          | Lysosome                                                                        | Vascular damage and direct<br>tumor cytotoxicity                                                     |                                       | [15]                 |
| Laserphyrin® / NPe6<br>/ Talaporfin (Chlorin<br>m-THPC) [1] | 664            | 2-4h                                  | Dark 2 days<br>Fluorescence<br>2-5days<br>Home 8-14<br>days [16] | <b>Approved (Japan):</b><br>Early lung cancer<br><b>Clinical trials</b><br>Hepatocellular<br>cancer, Liver<br>metastasis                                         | Japan                          |                                                                        | Lysosome,<br>endosome                                                           | Vascular stasis and<br>direct tumor<br>cytotoxicity                                                  | Meiji Seika,<br>Japan                 | [16]                 |
| Levulan®<br>(Protoporphyrin) [1]                            | 635            | 4-6h                                  | 48hours [17]                                                     | <b>Approved:</b><br>Actinic keratoses                                                                                                                            | EMA, USA,<br>Austria,<br>China | Stinging, burning,<br>itching, erythema                                | Mitochondria,<br>cytosol, cytosolic<br>membranes                                | Direct tumor<br>cytotoxicity                                                                         | DUSA, USA                             | [18]                 |
| Metvix® / Metvixia®<br>(Protoporphyrin) [1]                 | 635            | 3h                                    | 48h                                                              | <b>Approved:</b><br>Actinic keratoses,<br>basal cell<br>carcinoma                                                                                                | EMA, USA,<br>Canada            | Burning<br>sensation,<br>redness,<br>scabbing                          | Mitochondria,<br>cytosol, cytosolic<br>membranes                                | Direct tumor<br>cytotoxicity                                                                         | Galderma, UK                          | [19]                 |
| Redaporfin® [2]                                             | 749            | 24-72h [20]                           |                                                                  | <b>Clinical trials:</b><br>Biliary tract cancer<br>Head neck                                                                                                     | No                             |                                                                        | Endoplasmic reticulum and<br>Golgi apparatus.[21]                               | Vascular [20]                                                                                        | Luzitin,<br>Portugal                  | [22]<br>[23]         |
| Visudyne®<br>(Verteporfin)                                  | 690            | 1 h                                   |                                                                  | <b>Approved:</b><br>Age-related macular<br>degeneration                                                                                                          | Norway,<br>China               |                                                                        | DNA Fragmentation [10]<br>Mitochondria membrane<br>[24]                         |                                                                                                      | Novartis,<br>Switzerland              | [25]<br>[26]         |
| Ameluz®/Levulan®<br>(5-ALA)                                 | 635            | 3h                                    | 48h                                                              | <b>Approved:</b><br>Actinic Keratosis<br><b>Clinical trials:</b><br>Brain                                                                                        | Yes                            | Mild to moderate<br>actinic keratosis                                  |                                                                                 |                                                                                                      | DUSA, USA                             | [27]                 |
| Photochlor (HPPH)                                           | 655            |                                       |                                                                  | BCC, lung, head and neck<br>cancers                                                                                                                              | USA                            |                                                                        | Selectively accumulates in<br>the cytoplasm of cancer or<br>pre-cancerous cells |                                                                                                      | Roswell Park<br>Cancer Insti-<br>tute | [28]                 |

porphyrin-based photosensitizers

|                                                         |         |        |             |                                                                                               |    |                                                  |                                                                                        |                                                |  |      |
|---------------------------------------------------------|---------|--------|-------------|-----------------------------------------------------------------------------------------------|----|--------------------------------------------------|----------------------------------------------------------------------------------------|------------------------------------------------|--|------|
| Hypericin [1]                                           | 595     | 0.5-6h |             | <b>Preclinical testing:</b><br>Bladder cancer,<br>nasopharyngeal cancer                       | No | Slight damage to<br>surrounding<br>normal tissue | Membranes of<br>endoplasmic reticulum<br>(ER), membranes of<br>Golgi                   | Tumor cell cytotoxicity and<br>vascular damage |  |      |
| Chalcogenopyrylium<br>Dyes [1]                          | 592-746 | 24h    |             | <b>Preclinical testing:</b><br>Prostate cancer,<br>breast cancer, colon<br>cancer             | No | Dark toxicity                                    | Lysosomes                                                                              | Tumor cell and cytotoxicity                    |  |      |
| Phenothiazinium<br>dye—methylene<br>Blue [1]            | 666     | 1-4h   |             | <b>Preclinical testing:</b><br>Bladder cancer, colon cancer,<br>AIDS-related Kaposi's sarcoma | No |                                                  | Lysosomes                                                                              | Tumor cell and cytotoxicity                    |  |      |
| Phenothiazinium<br>dye—Nile blue<br>and derivatives [1] | 626,632 | 1h     |             | <b>Preclinical testing:</b><br>AIDS-related<br>Kaposi's sarcoma,<br>T-cell leukemia           | No | Minimal side<br>effects                          | ER, Golgi apparatus                                                                    | Tumor cell and cytotoxicity                    |  |      |
| Phenothiazinium<br>dye—toluidine Blue<br>[1]            | 650-660 | 30min  |             | <b>Preclinical testing:</b><br>Bladder cancer,<br>mouse mammary<br>sarcoma                    | No | Minimal side<br>effects                          | Lysosomes                                                                              | Tumor cell and cytotoxicity                    |  |      |
| Cyanines [1]                                            | 535-574 | 1h     |             | <b>Preclinical testing:</b><br>Leukemia, lymphoma                                             | No | Minimal side<br>effects                          | Mitochondria,<br>plasma membrane                                                       | Tumor cell and cytotoxicity                    |  |      |
| ADPM06 [1]                                              | 680     | <5min  |             | <b>Preclinical testing:</b><br>Breast cancer, mouse lung<br>cancer                            | No |                                                  | ER, mitochondria                                                                       | Vascular-targeted                              |  |      |
| Zinc phthalocyanine<br>2nd                              | 675     | 12 h   |             |                                                                                               | No |                                                  | These PS accumulate in<br>mitochondria<br>and apparently induces<br>apoptosis [5]      |                                                |  | [29] |
| Motexafin lutetium<br>(Lutex)                           | 720     | 3-24 h |             |                                                                                               | No |                                                  | Lutex binds to lysosomes<br>of EMT6 cells in vitro and<br>to produce apoptosis [10]    |                                                |  | [30] |
| Mono-L-aspartyl<br>chlorin                              | 664-667 | 4 h    | 3weeks [31] |                                                                                               | No |                                                  | Increased expression of<br>the mRNA of IL-2, IL-6, and<br>TNF- $\alpha$ 6 h later [10] |                                                |  | [31] |
| Phenotiazonium<br>salt, MB                              | 640     | 24h    |             |                                                                                               | No |                                                  |                                                                                        |                                                |  | [32] |

### References:

- O'Connor, A.E.; Gallagher, W.M.; Byrne, A.T. Porphyrin and nonporphyrin photosensitizers in oncology: Preclinical and clinical advances in photodynamic therapy. *Photochem. Photobiol.* 2009, **85**, 1053–1074.
- Baskaran, R.; Lee, J.; Yang, S.-G. Clinical development of photodynamic agents and therapeutic applications. *Biomater. Res.* **2018**, **22**, 25, doi:10.1186/s40824-018-0140-z.
- Khan, S.A.; Dougherty, T.J.; Mang, T.S. An evaluation of photodynamic therapy in the management of cutaneous metastases of breast cancer. *Eur. J. Cancer* **1993**, **29A**, 1686–90, doi:10.1016/0959-8049(93)90105-o.
- Kessel, D. Photodynamic therapy: Promotion of efficacy by a sequential protocol. *J. Porphyr. Phthalocyanines* **2016**, **20**, 302–306, doi:10.1142/S1088424616500073.
- Allison, R.R.; Sibata, C.H. Oncologic photodynamic therapy photosensitizers: A clinical review. *Photodiagnosis Photodyn. Ther.* 2010, **7**, 61–75.
- Ahn, T.G.; Lee, B.R.; Choi, E.Y.; Kim, D.W.; Han, S.J. Photodynamic therapy for breast cancer in a BALB/c mouse model. *J. Gynecol. Oncol.* **2012**, **23**, 115–119, doi:10.3802/jgo.2012.23.2.115.
- Azzouzi, A.R.; Barret, E.; Moore, C.M.; Villers, A.; Allen, C.; Scherz, A.; Muir, G.; De Wildt, M.; Barber, N.J.; Lebda, S.; et al. TOOKAD® Soluble vascular-targeted photodynamic (VTP) therapy: Determination of optimal treatment conditions and assessment of effects in patients with localised prostate cancer. *BJU Int.* **2013**, **112**, 766–774, doi:10.1111/bju.12265.
- Banerjee, S.M.M.; MacRobert, A.J.J.; Mosse, C.A.A.; Periera, B.; Bown, S.G.G.; Keshtgar, M.R.S.R.S. *Photodynamic therapy: Inception to application in breast cancer*; Churchill Livingstone, 2017; Vol. 31, pp. 105–113;.
- Biogen Inc ANNEX I SUMMARY OF PRODUCT CHARACTERISTICS Tecfidera 2013.

10. Castano, A.P.; Demidova, T.N.; Hamblin, M.R. Mechanisms in photodynamic therapy: Part two - Cellular signaling, cell metabolism and modes of cell death. *Photodiagnosis Photodyn. Ther.* **2005**, *2*, 1–23.
11. Cuenca, R.E.; Allison, R.R.; Sibata, C.; Downie, G.H. Breast cancer with chest wall progression: treatment with photodynamic therapy. *Ann. Surg. Oncol.* **2004**, *11*, 322–7, doi:10.1245/aso.2004.03.025.
12. Wyss, P.; Schwarz, V.; Dobler-Girdziunaite, D.; Hornung, R.; Walt, H.; Degen, A.; Fehr, M. Photodynamic therapy of locoregional breast cancer recurrences using a chlorin-type photosensitizer. *Int. J. Cancer* **2001**, *93*, 720–724, doi:10.1002/ijc.1400.
13. Bown, S.G.; Hatfield, A.W.R.; Rogowska, A.Z.; Whitelaw, D.E.; Lees, W.R.; Lovat, L.B.; Ripley, P.; Jones, L.; Wyld, P.; Gillams, A. Photodynamic therapy for cancer of the pancreas. *Gut* **2002**, *50*, 549–557, doi:10.1136/gut.50.4.549.
14. Bonnett, R.; Martínez, G. Photobleaching of sensitizers used in photodynamic therapy. *Tetrahedron* **2001**, *57*, 9513–9547.
15. Griffin, G.M.; Zhu, T.; Solonenko, M.; Del Piero, F.; Kapakin, A.; Busch, T.M.; Yodh, A.; Polin, G.; Bauer, T.; Fraker, D.; et al. Preclinical evaluation of motexafin lutetium-mediated intraperitoneal photodynamic therapy in a canine model. *Clin. Cancer Res.* **2001**, *7*, 374–81.
16. Nakamura, T.; Oinuma, T. Usefulness of photodynamic diagnosis and therapy using talaporfin sodium for an advanced-aged patient with inoperable gastric cancer (a secondary publication). *Laser Ther.* **2014**, *23*, 201–210, doi:10.5978/islsm.14-OR-16.
17. Ericson, M.B.; Wennberg, A.M.; Larkö, O. Review of photodynamic therapy in actinic keratosis and basal cell carcinoma. *Ther. Clin. Risk Manag.* **2008**, *4*, 1–9.
18. Osiecka, B.J.; Jarczyszyn, K.; Ziolkowski, P. The application of Levulan®-based photodynamic therapy with imiquimod in the treatment of recurrent basal cell carcinoma. *Med. Sci. Monit.* **2012**, *18*, PI5-9, doi:10.12659/msm.882449.
19. Freeman, M.; Vinciullo, C.; Francis, D.; Spelman, L.; Nguyen, R.; Fergin, P.; Thai, K.E.; Murrell, D.; Weightman, W.; Anderson, C.; et al. A comparison of photodynamic therapy using topical methyl aminolevulinate (Metvix®) with single cycle cryotherapy in patients with actinic keratosis: A prospective, randomized study. *J. Dermatolog. Treat.* **2003**, *14*, 99–106, doi:10.1080/09546630310012118.
20. Rocha, L.G.B. Development of a novel photosensitizer for photodynamic therapy of cancer.
21. Gomes- da- Silva, L.C.; Zhao, L.; Bezu, L.; Zhou, H.; Sauvat, A.; Liu, P.; Durand, S.; Leduc, M.; Souquere, S.; Loos, F.; et al. Photodynamic therapy with redaporfin targets the endoplasmic reticulum and Golgi apparatus. *EMBO J.* **2018**, *37*, doi:10.15252/embj.201798354.
22. S. Lobo, A.C.; Gomes-da-Silva, L.C.; Rodrigues-Santos, P.; Cabrita, A.; Santos-Rosa, M.; Arnaut, L.G. Immune Responses after Vascular Photodynamic Therapy with Redaporfin. *J. Clin. Med.* **2019**, *9*, 104, doi:10.3390/jcm9010104.
23. Santos, L.L.; Oliveira, J.; Monteiro, E.; Santos, J.; Sarmiento, C. Treatment of Head and Neck Cancer with Photodynamic Therapy with Redaporfin: A Clinical Case Report. *Case Rep. Oncol.* **2018**, *11*, 769–776, doi:10.1159/000493423.
24. Mahalingam, S.M.; Ordaz, J.D.; Low, P.S. Targeting of a Photosensitizer to the Mitochondrion Enhances the Potency of Photodynamic Therapy. *ACS Omega* **2018**, *3*, 6066–6074, doi:10.1021/acsomega.8b00692.
25. Detty, M.R.; Gibson, S.L.; Wagner, S.J. Current clinical and preclinical photosensitizers for use in photodynamic therapy. *J. Med. Chem.* **2004**, *47*, 3897–3915.
26. Banerjee; El-Sheikh; Malhotra; Mosse; Parker; Williams; MacRobert; Hamoudi; Bown; Keshtgar Photodynamic Therapy in Primary Breast Cancer. *J. Clin. Med.* **2020**, *9*, 483, doi:10.3390/jcm9020483.
27. Díez Valle, R.; Hadjipanayis, C.G.; Stummer, W. Established and emerging uses of 5-ALA in the brain: an overview. *J. Neurooncol.* **2019**, *141*, 487–494.
28. Q, X.; J, W.; X, P.; Y, J.; P, W.; AW, L.; L, G.; S, J.; C, X. Discovery and Development of Natural Products and their Derivatives as Photosensitizers for Photodynamic Therapy. *Curr. Med. Chem.* **2018**, *25*, 839–860, doi:10.2174/0929867324666170823143137.
29. Mfouo-Tynga, I.; Houreld, N.N.; Abrahamse, H. Induced Cell Death Pathway Post Photodynamic Therapy Using a Metallophthalocyanine Photosensitizer in Breast Cancer Cells. *Photomed. Laser Surg.* **2014**, *32*, 205–211, doi:10.1089/pho.2013.3650.
30. MacDonald, I.J.; Dougherty, T.J. Basic principles of photodynamic therapy. In *Proceedings of the Journal of Porphyrins and Phthalocyanines*; John Wiley and Sons Ltd, 2001; Vol. 5, pp. 105–129.
31. Taber, S.W.; Fingar, V.H.; Coots, C.T.; Wieman, T.J. Photodynamic therapy using mono-L-aspartyl chlorin e6 (Npe6) for the treatment of cutaneous disease: a Phase I clinical study. *Clin. Cancer Res.* **1998**, *4*, 2741–6.
32. dos Santos, A.F.; Terra, L.F.; Wailemann, R.A.M.; Oliveira, T.C.; de Moraes Gomes, V.; Mineiro, M.F.; Meotti, F.C.; Bruni-Cardoso, A.; Baptista, M.S.; Labriola, L. Methylene blue photodynamic therapy induces selective and massive cell death in human breast cancer cells. *BMC Cancer* **2017**, *17*, 194, doi:10.1186/s12885-017-3179-7.
